# Supplementary material for: Role of aromatic residues in amyloid fibril formation of human calcitonin by solid-state 13C NMR and molecular dynamics simulation
Source: Royal Society of Chemistry journal article supplement (doi:10.1039/c3cp44544e), 2013-01-01
Supplement: c3cp44544e.pdf [file c3cp44544e.pdf]

Supplementary Information

**Role of Aromatic Residues in Amyloid Fibril Formation of Human Calcitonin by  
Solid-State  $^{13}\text{C}$  NMR and Molecular Dynamics Simulation**

Hikari Itoh-Watanabe<sup>1</sup>, Miya Kamihira-Ishijima<sup>2</sup>, Namsrai Javkhlantugs<sup>1</sup>, Ryozo Inoue<sup>1</sup>, Yuki  
Itoh<sup>1</sup>, Hiroshi Endo<sup>1</sup>, Satoru Tuzi<sup>2</sup>, Hazime Saito<sup>2</sup>, Kazuyoshi Ueda<sup>1</sup>, Akira Naito<sup>1\*</sup>

<sup>1</sup>Graduate School of Engineering, Yokohama National University, 79-5 Tokiwadai, Hodogaya,  
Yokohama 240-8501, Japan, <sup>2</sup>Graduate School of Life Science, University of Hyogo, Harime  
Science Garden City, Kamigori, Hyogo 678-1297, Japan

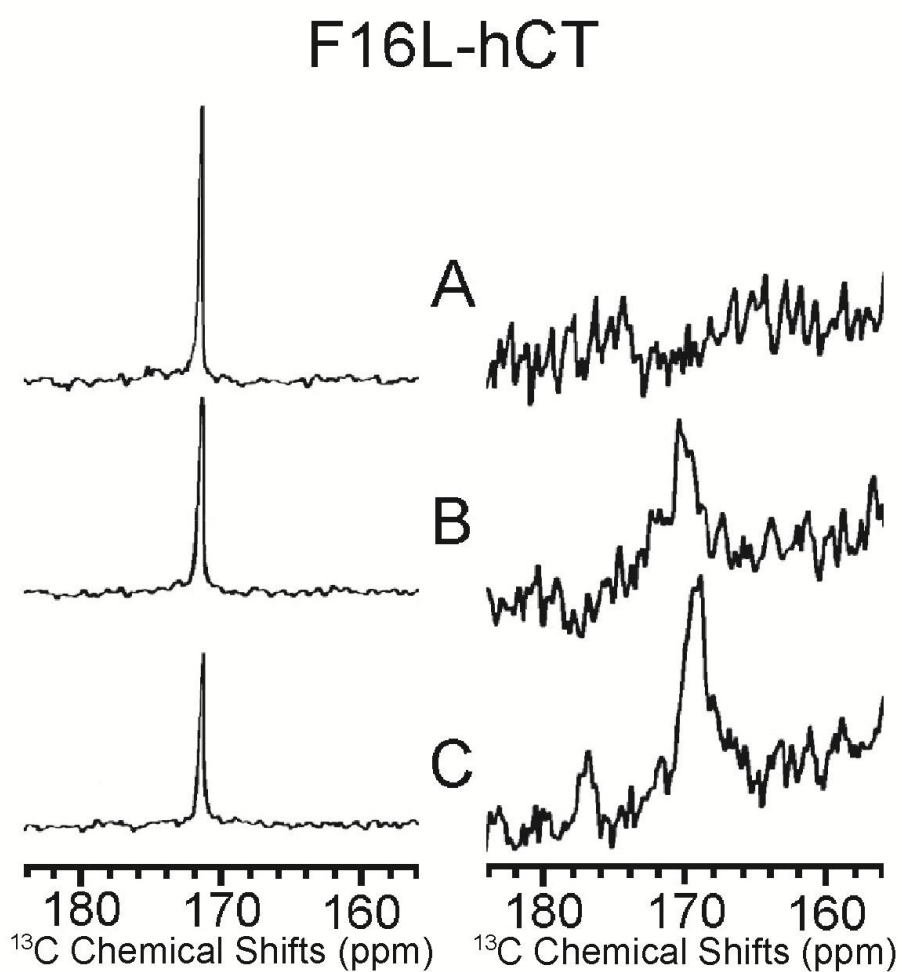

Fig. S1. Time course (A: 11 hr, B:66 hr, C:108 hr) of DD-MAS (left) and CP-MAS (right) NMR signals in [1- $^{13}\text{C}$ ]Gly10, [3- $^{13}\text{C}$ ]Ala26-labeled F16L-hCT (**III**) at pH 3.

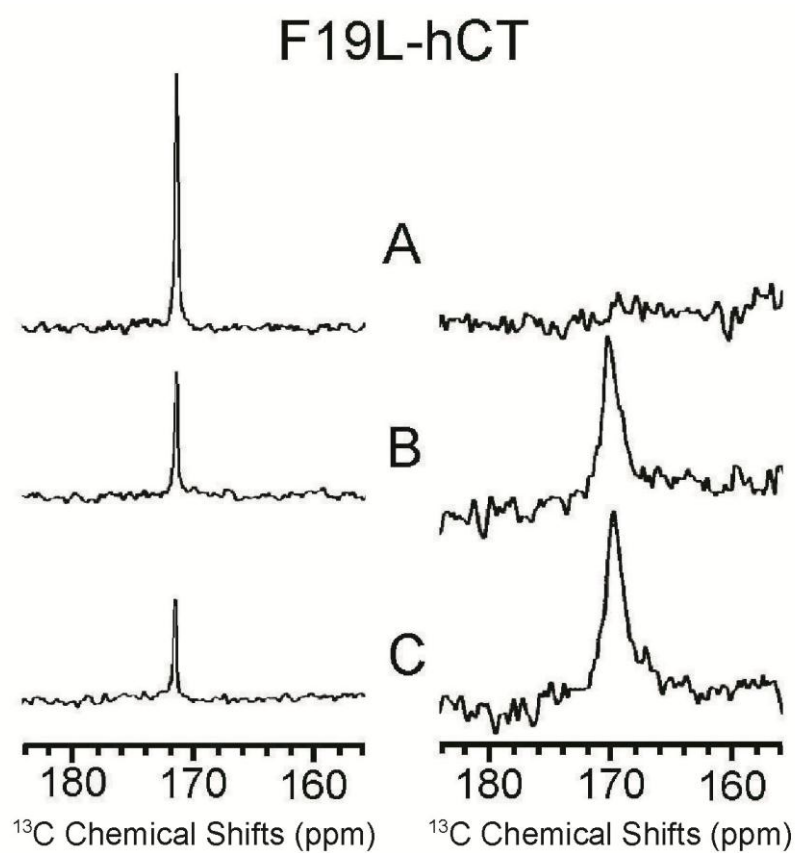

Fig. S2. Time course (A: 9 hr, B: 67 hr, C:121 hr) of DD-MAS (left) and CP-MAS (right) NMR signals in [1- $^{13}\text{C}$ ]Gly10, [3- $^{13}\text{C}$ ]Ala26-labeled F19L-hCT (**IV**) at pH 3.

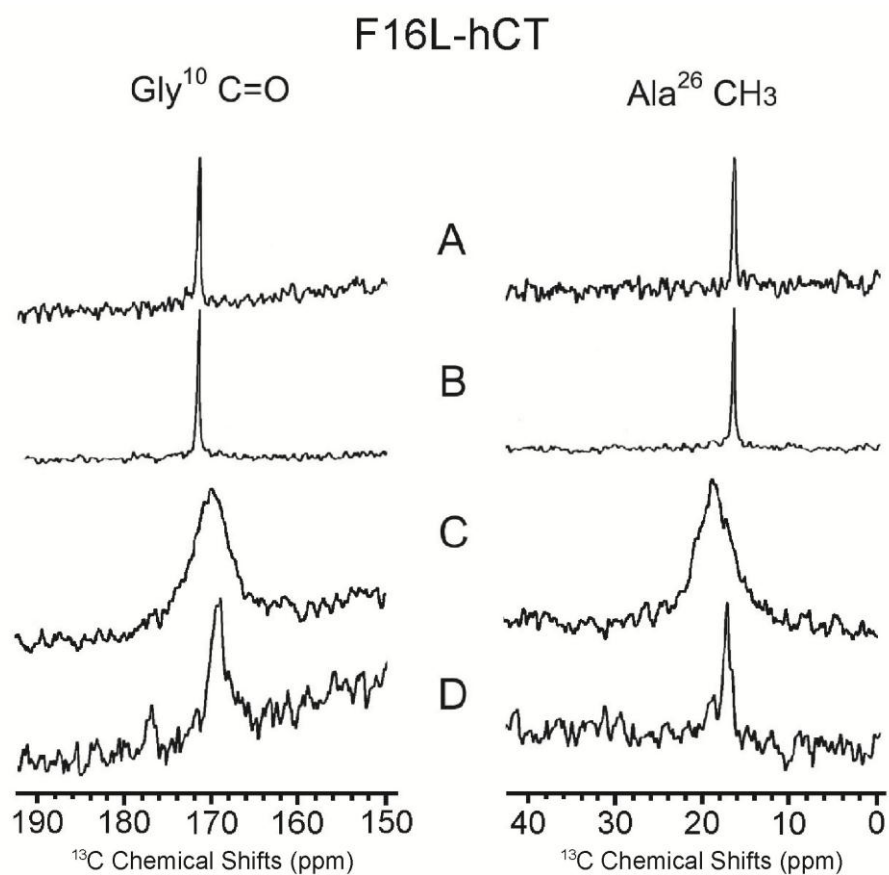

Fig. S3 DD-MAS (A, B) and CP-MAS (C, D) NMR spectra of [1-<sup>13</sup>C]Gly10 (left), [3-<sup>13</sup>C]Ala26 (right) -labeled F16L-hCT at pH 7.5 (A, C) and pH 3 (B, D)

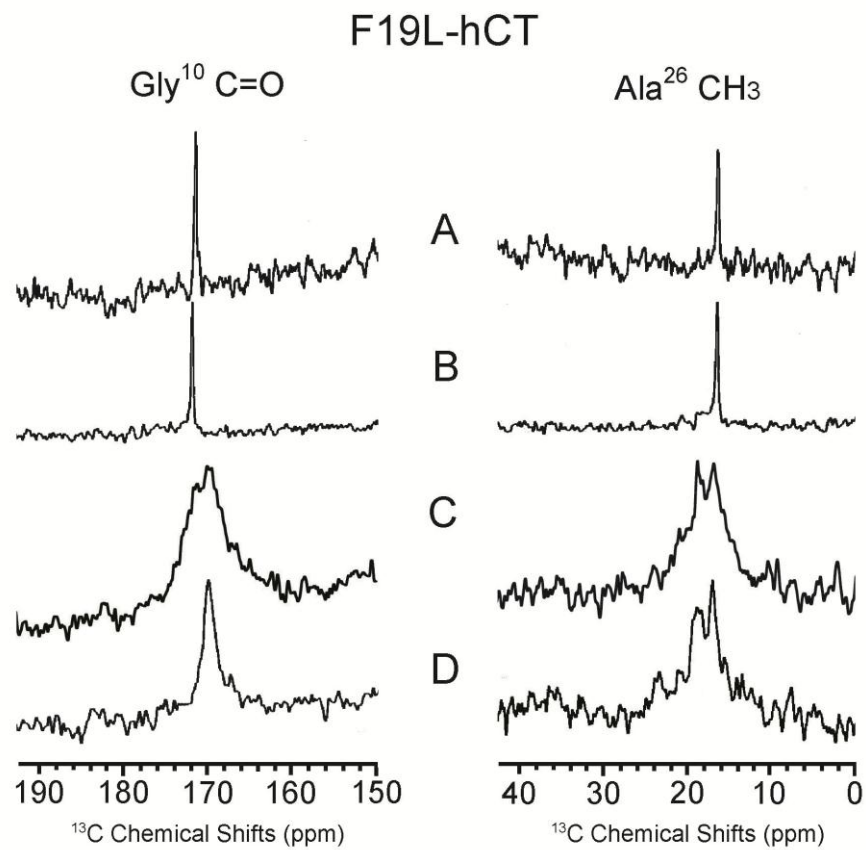

Fig. S4 DD-MAS (A, B) and CP-MAS (C, D) NMR spectra of [1-<sup>13</sup>C]Gly10 (left), [3-<sup>13</sup>C]Ala26 (right) -labeled F19L-hCT at pH 7.5 (A, C) and pH 3 (B, D)
